# Supplementary material for: Quantifying and modeling of stress-driven short-circuits in lithium-ion batteries in electrified vehicles
Source: Royal Society of Chemistry journal article supplement (doi:10.1039/d0ta12082k), 2021-01-01
Supplement: d0ta12082k1.pdf [file d0ta12082k1.pdf]

## Supporting Materials

# Quantifying and modeling of stress-driven short-circuit in lithium-ion batteries in electrified vehicles

Binghe Liu <sup>a,\*</sup>, Xudong Duan <sup>b, c\*</sup>, Chunhao Yuan <sup>d, e</sup>, Lubing Wang <sup>f, g</sup>, Jiani Li <sup>d, e</sup>, Donal P. Finegan <sup>h</sup>, Bill Feng <sup>i</sup>, Jun Xu <sup>d, e†</sup>

<sup>a</sup>*School of Automotive Engineering, Chongqing University, Chongqing 400044, China* <sup>b</sup>*Vehicle Energy & Safety Laboratory (VESL), Beihang University, Beijing, China, 100191*

<sup>c</sup>*Department of Automotive Engineering, School of Transportation Science and Engineering, Beihang University, Beijing 100191, China*

<sup>d</sup>*Department of Mechanical Engineering and Engineering Science, The University of North Carolina at Charlotte, Charlotte, NC 28223, USA.*

<sup>e</sup>*Vehicle Energy & Safety Laboratory (VESL), North Carolina Motorsports and Automotive Research Center, The University of North Carolina at Charlotte, Charlotte, NC 28223, USA.*

<sup>f</sup>*Safety Engineering, Ministry of Education, Ningbo University, Ningbo 315211, China*

<sup>g</sup>*Department of Mechanics and Engineering Science, Faculty of Mechanical Engineering & Mechanics, Ningbo University, Ningbo 315211, China*

<sup>h</sup>*National Renewable Energy Laboratory, 15013 Denver West Parkway, Golden CO 80401, USA*

<sup>i</sup>*Jaguar Land Rover, Coventry, CV34LF, UK*

---

\*These authors contributed equally.

†Corresponding author: Prof. Jun Xu at jun.xu@uncc.edu; Tel: (704)-687-8240; Fax: (704)-687-8240

To better observe the cracks of the current collector, the coatings were removed. The removing methods for each component are illustrated in Fig. S1.

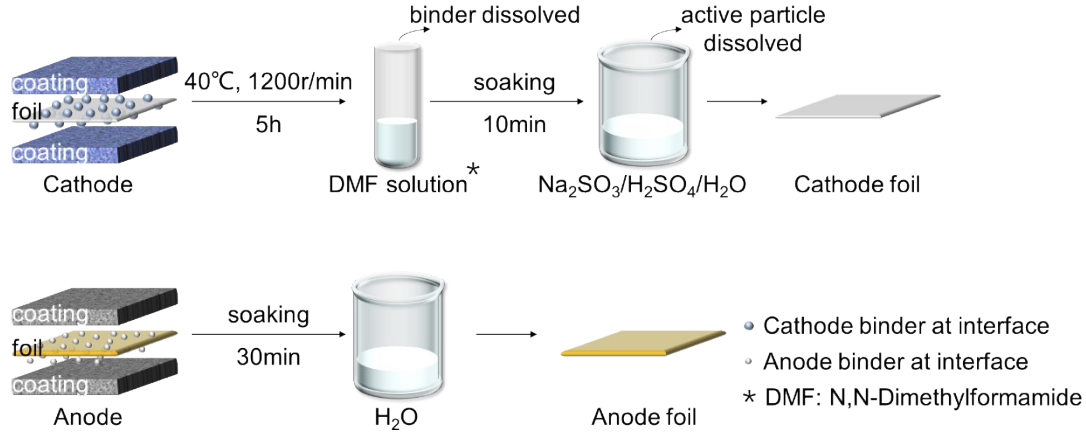

Fig.S1 The process of removing coatings of electrodes.

The Electrochemical Impedance Spectroscopy (EIS) in each compression displacement shows, the impedance of the battery started to increase after 4.7 mm (Fig. S2), which is supporting evidence of minor ISCs <sup>1</sup>.

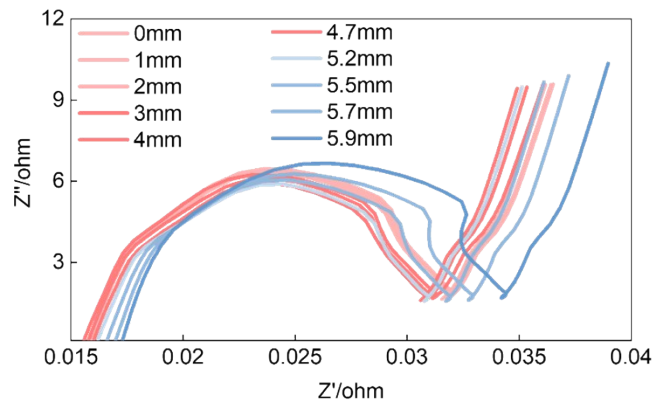

Fig. S2 EIS experiment results at different compression displacements.

To reveal the mechanism of the temperature response during the whole compressive process (Fig. 4(a)), we use the energy balance equation to estimate the temperature rise at key points :

$$\rho C_p \frac{\partial T}{\partial t} + \nabla \cdot \mathbf{q} = Q_s \quad (1)$$

where  $\rho$  is the mass density of jellyroll,  $C_p$  is the specific heat capacity of jellyroll,  $T$  is temperature,  $q$  is the heat flux and  $Q_s$  represents the total volumetric heat sources, which consist of the following heat sources:

$$Q_s = Q_{bat} + Q_{ISC} + Q_{tr} \quad (2)$$

where  $Q_{bat}$  is the battery heat induced by electrochemical reactions,  $Q_{ISC}$  is the ISC heat (joule heat) induced by ISC current and resistance related to the mechanical behaviors of each component in the battery, and  $Q_{tr}$  is the heat from the thermal runaway. The thermal runaway heat is often considered as the sum of the heat production from four chemical reactions induced when the temperature reaches 90 °C, including SEI decomposition, anode-electrolyte reaction, cathode-electrolyte reaction, and electrolyte decomposition. Note that the area of temperature rise captured by the infrared thermal imager locates in the jellyroll, so only the thermal parameters of the jellyroll are needed. Since the temperature distribution of each moment can be recorded and the time interval of temperature rise was observed to be very short, the heat flux and the battery heat are neglected when the temperature rise is estimated. Then the equation is simplified as:

$$\rho C_p \frac{\Delta T}{\Delta t} = Q_{ISC} + Q_{tr} \quad (3)$$

where  $\Delta T$  is the temperature rise during the time interval  $\Delta t$ .

At Point 1 (Fig. 4(a)), the minor ISC has happened and ISC heat  $Q_{ISC}^{minor}$  can be calculated by :

$$Q_{ISC}^{minor} = \frac{I_1^2 R_{minor}}{V_{minor}} \quad (4)$$

$$I_1 = \frac{U}{R_{minor}} \quad (5)$$

$$V_{minor} = \frac{R_{minor}}{100\Omega \cdot mm^2} \times h_{jell} \quad (6)$$

where  $U$  is the initial open circuit voltage (OCV) and  $h_{jell}$  is the thickness of one layer of jellyroll.  $V_{minor}$  represents the zone where minor ISC happens. According to the filming frequency of 30 frames in one second of the Thermal Camera, the time interval can be decided  $\Delta t_1 = 0.033s$ . During this time, the chemical reactions related to thermal runaway can be neglected  $Q_{tr} = 0$  due to the temperature far below 90 °C. Other needed parameters are summarized in Table S1. Then temperature rise  $\Delta T_1$  where minor ISC happens can be calculated.

At Point 6 (Fig. 4(a)), the major ISC has happened and the resistance  $R_{major}$  can be estimated by :

$$\Delta U = \frac{U \times R_{inter}}{R_{inter} + R_{major}} \quad (7)$$

where  $R_{inter}$  is the internal resistance of the battery. Previous researches have proposed that ISC heat is much higher than thermal runaway heat when the batteries are in low SOC (SOC of the samples used in our tests are all 0.1). Herein, the thermal runaway heat can also be neglected  $Q_{tr} = 0$ . Similarly,  $Q_{ISC}^{major}$  can be calculated by :

$$Q_{ISC}^{major} = \frac{I_2^2 R_{major}}{V_{major}} \quad (8)$$

$$I_2 = \frac{U}{R_{major}} \quad (9)$$

where  $V_{major}$  is estimated through the image captured by the Thermal Camera at Point 6 and the measurement of damage area after disassembling. Then the temperature rise at Point 6  $\Delta T_2$  can be calculated.

**Table S1.** The parameters used for calculation of temperature rise during compression.

| Parameters  | Value                     | References   |
|-------------|---------------------------|--------------|
| $\rho$      | 2.247e3 kg/m <sup>3</sup> | <sup>2</sup> |
| $C_p$       | 785 J/(kg · K)            | <sup>2</sup> |
| $U$         | 3.3758 V                  | measured     |
| $h_{jell}$  | 0.252 mm                  | measured     |
| $R_{inter}$ | 0.048 $\Omega$            | provided     |
| $V_{major}$ | 6.98mm <sup>3</sup>       | estimated    |

The minor ISC was identified by the continuous drop of  $dU/dt$ . There are three steps to identify the minor ISC triggering point.

Step 1: Extract the data for analysis. Extract the data before the voltage drop 0.01V abruptly.

Step 2: Choose the zones to be identified. Zones where the range of  $d^2U / dt^2 < 0$  exceeds 0.2 mm (2s) are regarded as the “suspicious” zones of minor ISC triggering zone to be further identified.

Step 3: Identify the minor ISC triggering point. First, select the  $dU/dt$  data within the initial 0.2mm range of each suspicious curve for a linear fitting and calculate the standard deviation,  $\Sigma$ . The linear fitting curve serves as the baseline, and two boundaries can be confirmed based on the three-sigma rule. This zone represents that almost all subsequent  $dU/dt$  data should be in this region, and if the actual  $dU/dt$  data exceeds this range, there must be some factors leading to the change of internal battery state. If the follow-up  $dU/dt$  curve is higher than the region, it is considered that the curve is no longer dropping, and the minor ISC is not triggered. Otherwise, it is considered that the irreversible change is caused by the minor ISC, and the starting point of the

suspicious region is regarded as the trigger point of the minor ISC.

The minor ISC identified method is then used in all loading conditions, and Fig. S3(a) shows the example of the compression loadings. The identified results for the other loading conditions are shown in Figs. S3(b)-(d).

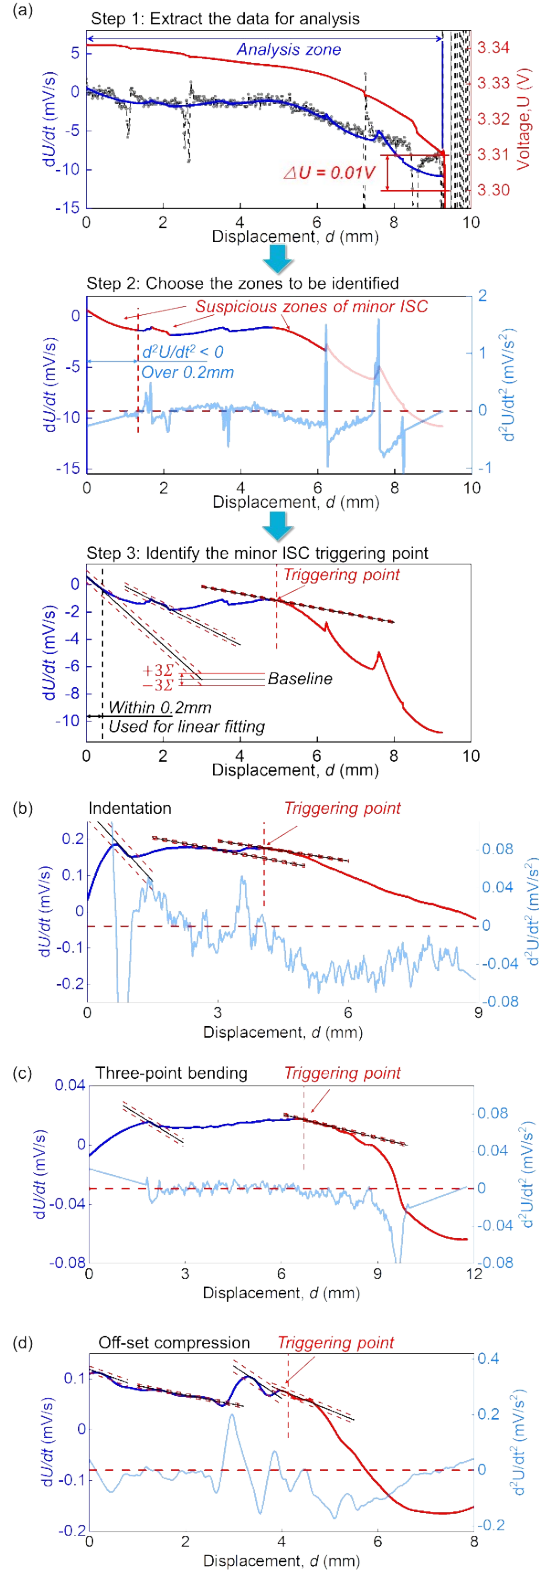

Fig. S3 (a) A demonstration case to identify the minor ISC triggering point for compression loadings, and the identified results for (b) indentation, (c) bending and (d) offset compression.

Given the complicated multiphysics nature of LIBs, we used the method proposed in our previous study<sup>38</sup> and established a multiphysics to describe the process for the LIB subjected to compressive loading. With the increase of compression displacement, stress concentration firstly appeared at the center of the section, and when it reached Point 1, maximum equivalent plastic strain (PEEQ) was just over 0.2755 (Fig. 6(c)), which was set to the critical PEEQ value of minor ISC,  $\bar{\varepsilon}_{eq,minor}^* = 0.2775$ . The model summed up the area where the strain exceeded  $\bar{\varepsilon}_{eq,minor}^*$  and obtained the minor ISC area,  $S_{mt}$  which was further normalized as follows:

$$S_{mt}^* = \frac{S_{mt}}{\pi R^{LB^2}} \quad (10)$$

where  $R^{LB}$  is the radius of LIB. The compression displacement increased continuously and the minor ISC area expanded, leading to the decrease of minor ISC resistance  $R_{minor}$ . The relationship between stress/strain and  $R_{minor}$  was described as follows:

$$R_{minor} = R_{minor}^{initial} (1 - S_{minor}^*) \quad (11)$$

where  $R_{minor}^{initial}$  is a fitting parameter. By comparing experiment and simulation results, the value of  $R_{minor}^{initial}$  was confirmed as  $200\Omega$ .

Similarly, the PEEQ value of major ISC was set as  $\bar{\varepsilon}_{eq,major}^* = 0.351$  (Fig. 6(d)) and the major ISC resistance  $R_{major}$  was set as  $R_{major} = R_{major}^{initial} (1 - S_{major}^*)$ , where  $R_{major}^{initial}$  was confirmed as  $0.1\Omega$  and  $S_{major}^*$  was normalized from the major ISC area. More details to establish the Multiphysics model can be found in Ref. <sup>38</sup>.

Figs.6(c) and (d) show that the model can predict both the  $dU/dt$ -time and the voltage-time curves

decently and the temperature distribution predicted by the model can match with the test results shown in Fig.4(c). From the model, we confirmed some conclusions:

- Stress/strain is the most direct causation of ISCs and the stress/strain concentration determines the location of ISCs;
- At Point 1, minor ISC was triggered and a minor ISC resistance about  $200\Omega$  was induced;
- With the increase of compression loading, the minor ISC region continued to expand and lead to the decrease of minor ISC resistance;
- At Point 5, a much more serious ISC occurred with a ISC resistance of  $0.1\Omega$  in the area of stress/strain concentration leading to the temperature concentration.

All the battery samples used to explore the ISC mechanism were charged to 0.1 SOC and tested at the room temperature. It needs to be pointed that the SOC and environmental temperature can impact the ISC behavior under various loading conditions. Ref. <sup>3</sup> has reported that lower environmental temperature would soften the battery and made it easier to be crushed. Our previous studies <sup>4,5</sup> have explored the relationship between mechanical parameters and SOC, and proposed some functions with SOC as the independent variable to describe the mechanical parameters, including the structural stiffness, nominal failure stress, and strain. Herein, we additionally conducted compression, indentation, and three-point bending tests using complete LIB cells (without removing the negative cap) with different SOC values, and the results are summarized in Fig. S4. It shows that the mechanical and ISC behaviors have SOC dependency, which has a good agreement with our previous study<sup>32</sup>. With the increase of SOC, the moment of minor ISC was closer and closer to that of major ISC, and the range of  $dU/dt$  became smaller. For further study,

we can combine the EIS and disassembly experiments to identify minor ISC precisely and use the method in Ref. <sup>4</sup> to establish the functions between the mechanical parameters & critical values of ISCs and the variable of SOC.

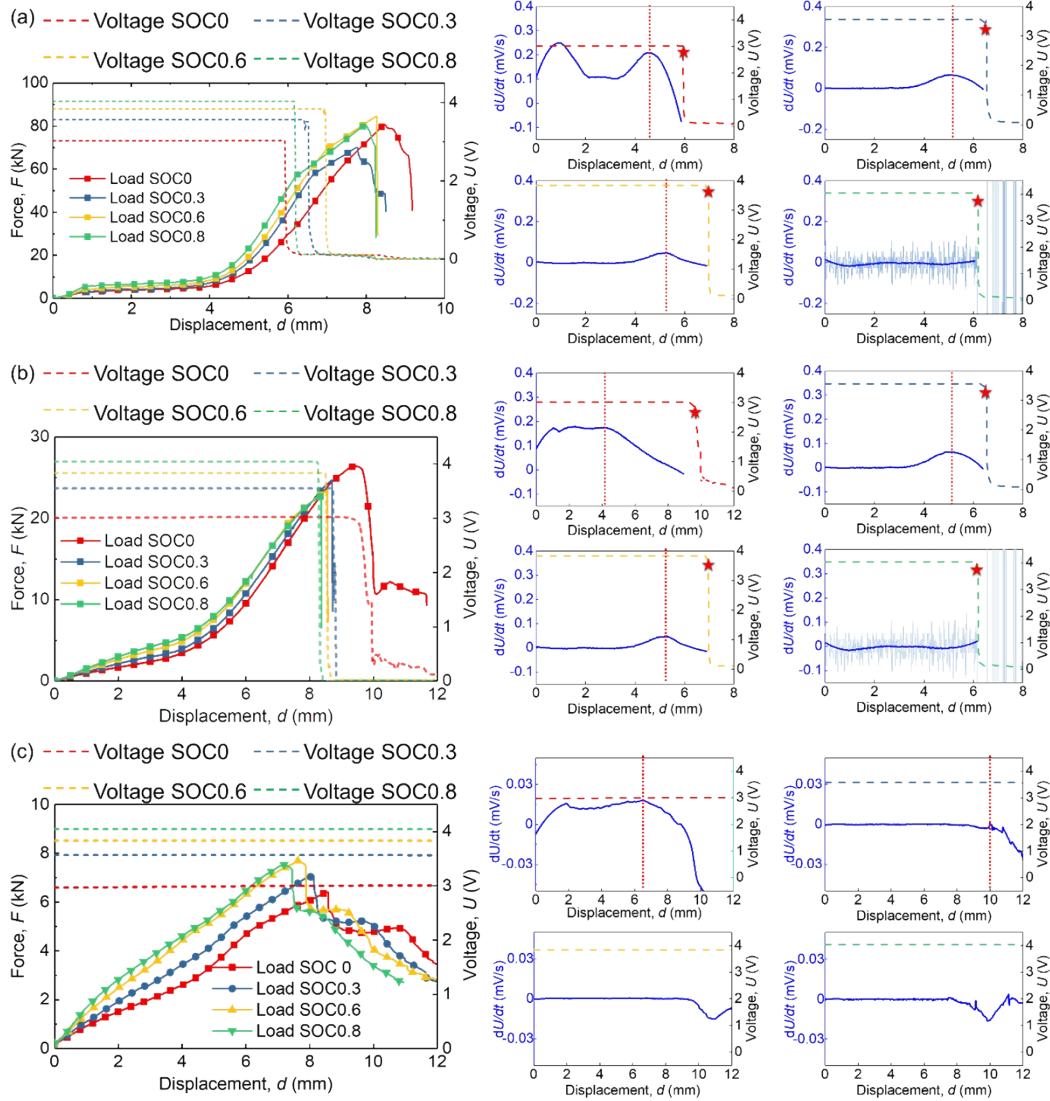

Fig. S4 The force-, voltage-,  $dU/dt$ -displacement curves and the markers of minor/major ISCs from experiments using LIBs with different SOC's (the red dotted line represents the minor ISC and the red star point represents major ISC) under (a) compression (LIBs without removing the negative cap), (b) Indentation and (c) Three-point bending

To build the finite element model of the battery (the geometric configuration of the cross

section is shown in Fig. S4(a)) which can predict the mechanical deformation of the whole structure and the failure of the local components, both the equivalent model (the composing of 1 layer of the anode, 1 layer of the cathode, and 2 layers of the separator is regarded as one homogenized material with equivalent material properties) and detailed model (considering the detail of the layers) are used, as shown in Fig. S4(b).

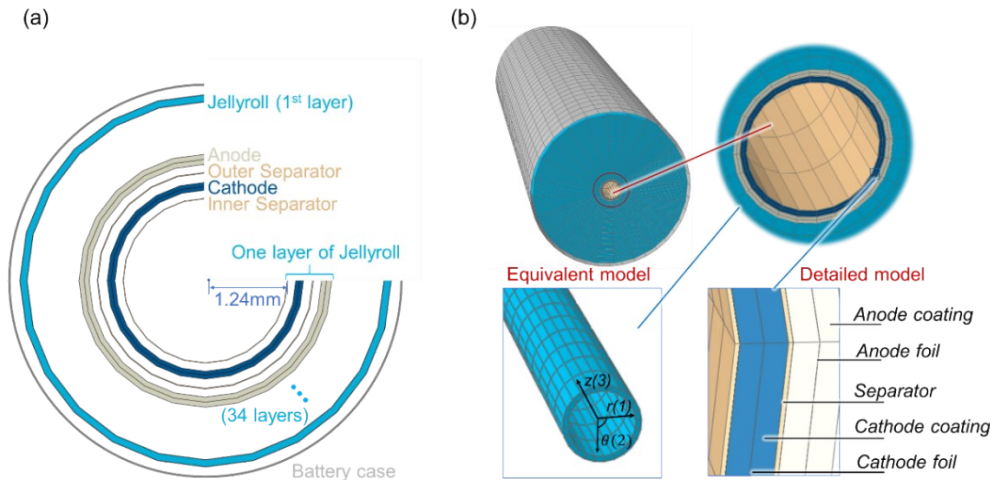

Fig. S5 The schematic diagram of the target battery, (a) geometric configuration of cross-section, (b) the equivalent model, and a detailed model of LIB.

The experiments for the components included *in-situ/ex-situ* characterization experiments in tension, compression, and indentation. For the cell level, compression, indentation, bending, and offset compression were conducted. Thermal field, load, and voltage were measured for compression loadings (the cap of the battery is removed in this loading), and the load and voltage are measured in the other three loadings

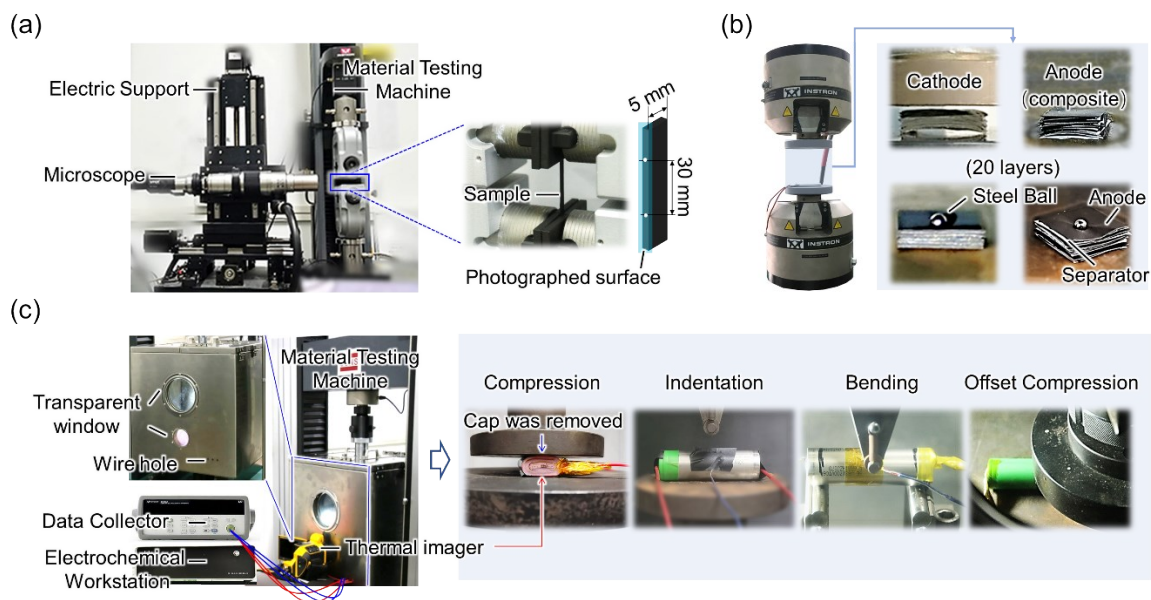

Fig. S6 (a) the in-situ experiment setting for tension, (b) the experiment settings for stacking compression and indentation, and (c) the experiment settings for LIB under different loading conditions.

The failures of the repeated experiments for the components on compression and indentation are summarized in Fig. S7.

| Loading condition | Material          | Test number | Results                                                                             |                                                                                       |
|-------------------|-------------------|-------------|-------------------------------------------------------------------------------------|---------------------------------------------------------------------------------------|
|                   |                   |             | Force level 1                                                                       | Force level 2                                                                         |
| compression       | cathode           | Test 1      | 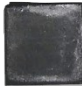   | 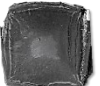   |
|                   |                   | Test 2      | 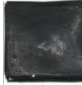   | 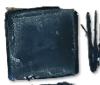   |
|                   | anode (composite) |             | 3 <sup>rd</sup> Layer-foil & separator                                              |                                                                                       |
|                   |                   | Test 1      | 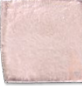   | 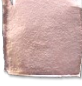   |
|                   |                   | Test 2      | 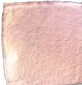   | 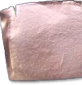   |
|                   |                   |             |                                                                                     |                                                                                       |
| Indentation       | cathode           | Test 1      | 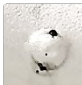   | 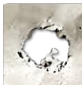   |
|                   |                   | Test 2      | 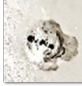   | 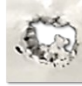   |
|                   | anode (composite) |             | 1 <sup>st</sup> Layer-Foil                                                          | 1 <sup>st</sup> Layer-Foil 4 <sup>th</sup> Layer-Foil                                 |
|                   |                   | Test 1      | 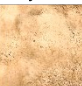 | 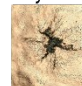 |
|                   |                   | Test 2      | 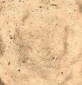 | 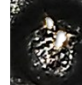 |
|                   |                   |             | 1 <sup>st</sup> Layer-foil & separator                                              | 5 <sup>th</sup> Layer-foil & separator                                                |

Fig. S7 The morphology of samples under each specific force level.

The *ex-situ* characterization was conducted in different force levels. The chosen of the force levels in compression and indentation loadings are summarized in Table S2.

**Table S2.** The preset force levels and examination method of samples in compression and indentation tests.

| Loading condition | Material          | Force level (kN) | Sample preparation          |
|-------------------|-------------------|------------------|-----------------------------|
| Compression       | cathode           | 80, 100          | /                           |
|                   | anode (composite) | 20,60            | Remove coating              |
| Indentation       | cathode           | 0.4, 0.8         | Remove coating              |
|                   | anode (composite) | 0.4, 0.7         | Remove coating + microscope |

The geometric parameters of the components of the LIB is summarized in Table S3.

**Table S3.** Geometric parameters of components.

| Components      | Thickness (mm) | Length (mm) | Neutral zone radius (mm) |
|-----------------|----------------|-------------|--------------------------|
| Battery case    | 0.2            | 70.3        | 10.65                    |
| Jellyroll       | 0.252          |             | 10.186 (outermost layer) |
| Cathode-foil    | 0.01           |             | /                        |
| Cathode-coating | 0.05           |             | /                        |
| Anode-foil      | 0.02           | 65          | /                        |
| Anode-coating   | 0.05           |             | /                        |
| Separator       | 0.011          |             | /                        |

\* The lengths of electrodes and separators are considered to be the same as that of the jellyroll.

The mechanical mesh parameters of the components for the tensile FEM and other loading conditions are summarized in Table S4 and S5 separately.

**Table S4.** Mechanical and mesh parameters of components for tensile FEM.

| Components      | Modulus<br>(MPa) | Poisson ratio | Yield stress<br>(MPa) | Damage<br>initiation strain | Damage<br>evolution | Interfacial<br>adhesive strength<br>(kPa) | Global<br>mesh size<br>(mm) |
|-----------------|------------------|---------------|-----------------------|-----------------------------|---------------------|-------------------------------------------|-----------------------------|
| Cathode-foil    | 25470.7          | 0.3           | 80.79                 | 0.0147                      | 0                   | /                                         | 0.02                        |
| Cathode-coating | 4513.22          |               | 10.23                 | 0.14                        | 0                   |                                           | 0.02                        |
| Anode-foil      | 28000            |               | 70                    | 0.2                         | 0.001               | 248 <sup>22</sup>                         | 0.02                        |
| Anode-coating   | 4510             |               | 16.64                 | 0.065                       | 0.002               |                                           | 0.02                        |
| Separator       | 1160             |               | 14.201                | 0.3                         | 0                   | /                                         | 0.25                        |

**Table S5.** Mechanical and mesh parameters of components for all loading conditions.

| Component<br>s  | Modulus (MPa) |       |       | Poisson ratio |         |         | Shear modulus (MPa) |          |          | Plastic parameters       |                   |       | Damage<br>initiation strain | Damage<br>evolution | Mesh<br>size<br>(mm) | Element number              |
|-----------------|---------------|-------|-------|---------------|---------|---------|---------------------|----------|----------|--------------------------|-------------------|-------|-----------------------------|---------------------|----------------------|-----------------------------|
|                 | $E_1$         | $E_2$ | $E_3$ | $\nu_1$       | $\nu_2$ | $\nu_3$ | $G_{12}$            | $G_{13}$ | $G_{23}$ | Yield<br>stress<br>(MPa) | Crushable<br>foam |       |                             |                     |                      |                             |
|                 |               |       |       |               |         |         |                     |          |          |                          | $k$               | $k_t$ |                             |                     |                      |                             |
|                 |               |       |       |               |         |         |                     |          |          |                          |                   |       |                             |                     |                      |                             |
| Battery case    | 211000        |       |       | 0.3           |         |         | /                   |          |          | 358.7                    | /                 | /     | /                           | /                   | 0.74-2.33            | 1480/1340(without cap)      |
| Jellyroll       | 700           | 6929  | 6929  | 0.15          | 0.15    | 0.3     | 1017                | 1017     | 2665     | 0.56                     | /                 | /     | /                           | /                   | 0.25-2.69            | 25920 (36 circles in total) |
| Cathode-foil    | 70623.9       |       |       | 0.3           |         |         | /                   |          |          | 154.614                  | /                 | /     | 0.5                         | 0.01                | 0.25*                | /                           |
| Cathode-coating | 4000          |       |       | 0             |         |         | /                   |          |          | /                        | 2.3               | 0.05  | 0.22                        | 0.135               | 0.25*                | /                           |
| Anode-foil      | 45425.1       |       |       | 0.3           |         |         | /                   |          |          | 161.039                  | /                 | /     | 0.4                         | 0.01                | 0.5*                 | /                           |
| Anode-coating   | 700           |       |       | 0.3           |         |         | /                   |          |          | /                        | 2                 | 0.4   | 0.5                         | 0.12                | 0.5*                 | /                           |
| Separator       | 1160          |       |       | 0.3           |         |         | /                   |          |          | 14.201                   | /                 | /     | 0.3                         | 0                   | 0.5*                 | /                           |

\* The presentative mesh size of each component used in compression models

## Reference

1. X. Kong, G. L. Plett, M. S. Trimboli, Z. Zhang, D. Qiao, T. Zhao and Y. Zheng, *Journal of Energy Storage*, 2020, **27**, 101085.
2. C. H. Yuan, X. Gao, H. K. Wong, B. Feng and J. Xu, *J. Electrochem. Soc.*, 2019, **166**, A1160-A1169.
3. Z. Gao, X. Zhang, Y. Xiao, H. Gao, H. Wang and C. Piao, *Energies*, 2019, **12**.
4. J. Xu, B. Liu and D. Hu, *Sci Rep-UK*, 2016, **6**, 21829.
5. L. Wang, S. Yin, C. Zhang, Y. Huan and J. Xu, *J. Power Sources*, 2018, **392**, 265-273.
